# Supplementary material for: Change in dust variability in the Atlantic sector of Antarctica at the end of the last deglaciation
Source: Copernicus journal article supplement (doi:10.5194/cp-8-135-2012), 2012-01-19
Supplement: Supplementary file 1 [file cp-8-135-2012-supplement.pdf]

Table 1: Full acid digestion of the PSA samples

| sample volume 2 or 5 mL                                                          |              |                  |                              |
|----------------------------------------------------------------------------------|--------------|------------------|------------------------------|
| addition of 10 mL HNO <sub>3</sub> , 5 mL HF, 5 mL H <sub>2</sub> O <sub>2</sub> |              |                  |                              |
| digestion according to the following procedure                                   |              |                  |                              |
| step                                                                             | duration [h] | temperature [°C] | comment                      |
| 0                                                                                |              | 20               |                              |
| 1                                                                                | 1            | 100              | heat                         |
| 2                                                                                | 12           | 100              | hold                         |
| 3                                                                                | end          |                  | let cool to room temperature |
| close beakers tightly                                                            |              |                  |                              |
| 0                                                                                |              | 20               |                              |
| 1                                                                                | 1            | 100              | heat                         |
| 2                                                                                | 5            | 100              | hold                         |
| 3                                                                                | 1            | 120              | heat                         |
| 4                                                                                | 2            | 120              | hold                         |
| 5                                                                                | 1            | 140              | heat                         |
| 6                                                                                | 2            | 140              | hold                         |
| 7                                                                                | 1            | 160              | heat                         |
| 8                                                                                | 2            | 160              | hold                         |
| 9                                                                                | 1            | 180              | heat                         |
| 10                                                                               | 2            | 180              | hold                         |
| 11                                                                               | 1            | 210              | heat                         |
| 12                                                                               | 5            | 210              | hold                         |
| 13                                                                               | 1.5          | 170              | cool                         |
| 14                                                                               | 1            | 160              | cool                         |
| 15                                                                               | 1.5          | 140              | cool                         |
| 16                                                                               | 1            | 140              | hold                         |
| 17                                                                               | 1            | 120              | cool                         |
| 18                                                                               | 1            | 100              | cool                         |
| 19                                                                               | end          |                  | let cool to room temperature |
| add 10 mL ultra pure water to reduce Al and CaF                                  |              |                  |                              |
| 0                                                                                |              | 20               |                              |
| 1                                                                                | 1            | 100              | heat                         |
| 2                                                                                | 4            | 100              | hold                         |
| 3                                                                                | end          |                  | let cool to room temperature |

Table 1 (continued)

| subboiling to 5 - 10 mL to reduce the acid                          |              |                  |                              |
|---------------------------------------------------------------------|--------------|------------------|------------------------------|
| step                                                                | duration [h] | temperature [°C] | comment                      |
| 0                                                                   |              | 20               | lower heating plate          |
| 1                                                                   | 2            | 160              | heat                         |
| 2                                                                   | 1.5          | 160              | hold                         |
| 3                                                                   | end          |                  | let cool to room temperature |
| 0                                                                   |              | 20               | upper heating plate          |
| 1                                                                   | 1.33         | 110              | heat                         |
| 2                                                                   | 4            | 110              | hold                         |
| 3                                                                   | end          |                  | let cool to room temperature |
| transfer sample to 25 mL vial, filling up to 25 mL with 2 % $HNO_3$ |              |                  |                              |

Table 2: Cleaning procedure for the samples vials used for the PSA sample analysis

|        |                                                                                                 |
|--------|-------------------------------------------------------------------------------------------------|
| 1 week | industrial cleaning agent (3 % Mucosol, 97 % ultra pure water)<br>rinsing with ultra pure water |
| 1 week | HCl-bath (25 % HCl, 75 % ultra pure water)<br>rinsing with ultra pure water                     |
| 1 week | $HNO_3$ -bath (25 % $HNO_3$ , 75 % ultra pure water)<br>rinsing with ultra pure water           |
| 1 week | $HNO_3$ -bath (10 % $HNO_3$ , 90 % ultra pure water)<br>rinsing with ultra pure water           |
|        | drying under clean bench class 100<br>sealing twice into PE-bags for storage                    |

## Used reagents:

- ultra pure water: production by coupling a reverse osmosis system with a Purelab ultra system (Elga, High Wycombe, U.K.)
- industrial cleaning agent: MUCASOL, Fa. Merck
- HCl: HCl suprapur, Fa. Merck
- $HNO_3$ :  $HNO_3$  p.a. 65 %, Fa. Merck
